# Supplementary material for: Design and synthesis of a novel blue-emitting CaNaSb2O6F:Bi3+ phosphor for optical temperature sensing
Source: Royal Society of Chemistry journal article supplement (doi:10.1039/d2dt00161f), 2022-01-01
Supplement: d2dt00161f1.pdf [file d2dt00161f1.pdf]

## Supporting Information

### Design and synthesis of a novel blue-emitting $\text{CaNaSb}_2\text{O}_6\text{F}:\text{Bi}^{3+}$ phosphor for optical temperature sensing

Xuexia Chen,<sup>a,b</sup> Ran Pang,<sup>a</sup> Shangwei Wang,<sup>a</sup> Jiangyue Su,<sup>a,b</sup> Weihong Yuan,<sup>a,b</sup>  
Shengjian Jiao,<sup>a,b</sup> Haiyan Wu,<sup>a,b</sup> Da Li,<sup>\*a</sup> Chengyu Li<sup>a,b</sup> and Hongjie Zhang<sup>a,c</sup>

<sup>a</sup> State key Laboratory of Rare Earth Resource Utilization, Changchun Institute of Applied Chemistry, Chinese Academy of Sciences, Changchun 130022, P. R. China

<sup>b</sup> School of Applied Chemistry and Engineering, University of Science and Technology of China, Hefei 230026, China

<sup>c</sup> The GBA National Institute for Nanotechnology Innovation, Guangzhou 510535, China

\* Corresponding author: Tel: +86-0431-85262258  
E-mail address: [cyli@ciac.ac.cn](mailto:cyli@ciac.ac.cn) and [pangran@ciac.ac.cn](mailto:pangran@ciac.ac.cn)

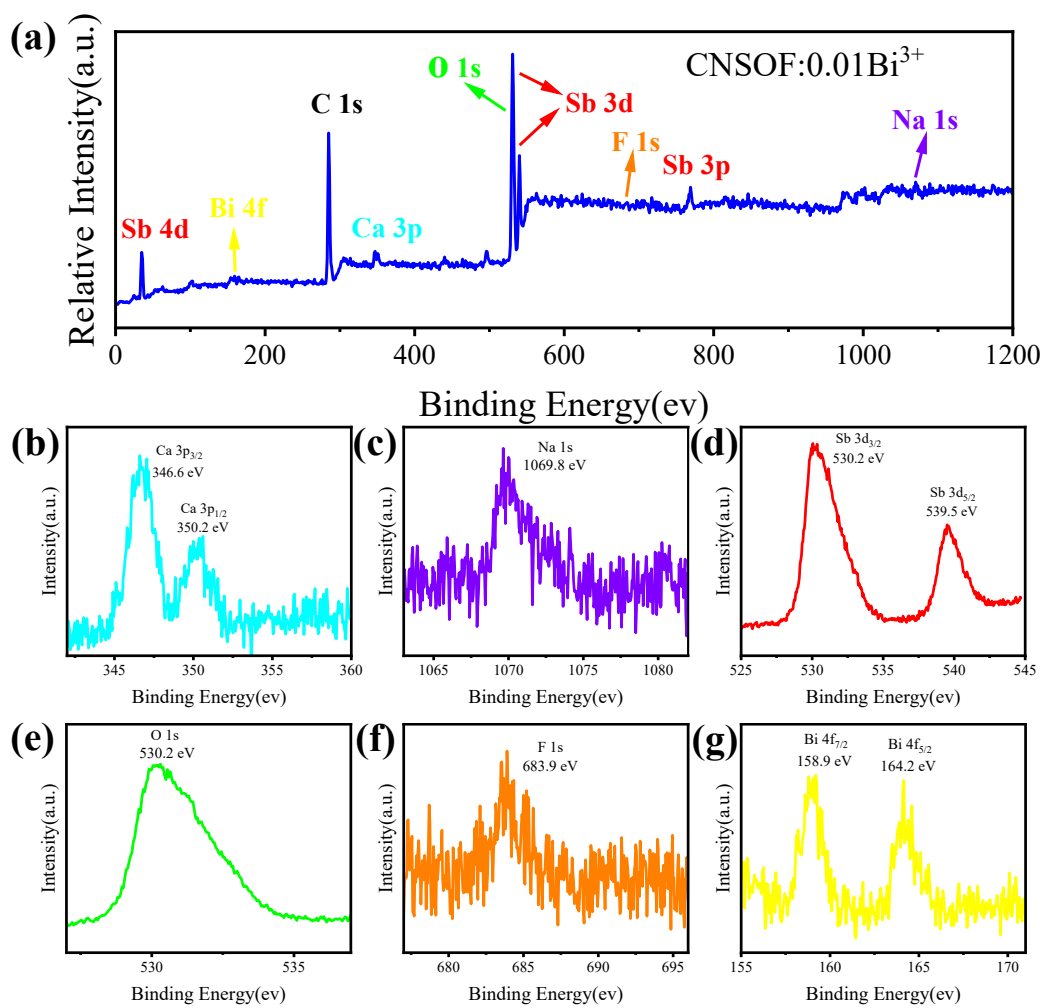

**Fig. S1** XPS spectrogram of the CNSOF:Bi<sup>3+</sup> phosphor. (a) Survey spectrum, (b) Ca-3p, (c) Na-1s, (d) Sb-3d, (e) O-1s, (f) F-1s and (g) Bi-4f.

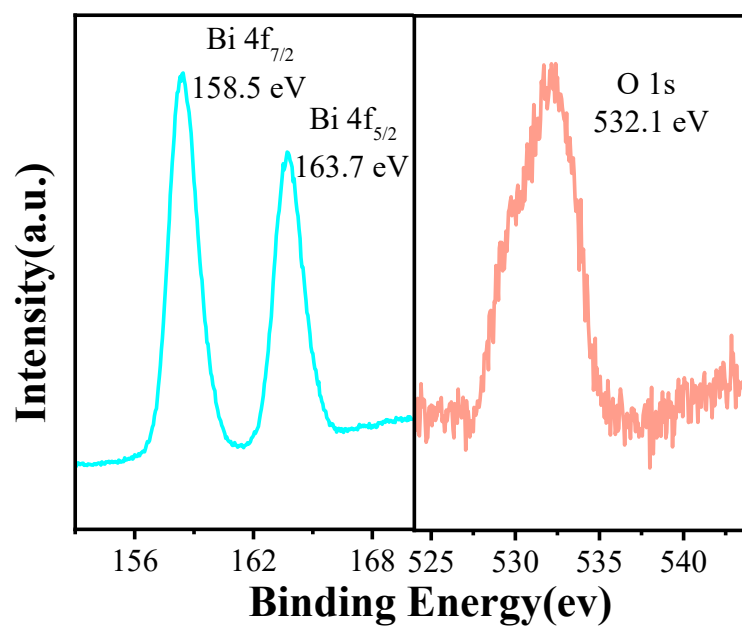

**Fig. S2** XPS survey spectrum of the Bi<sub>2</sub>O<sub>3</sub>.

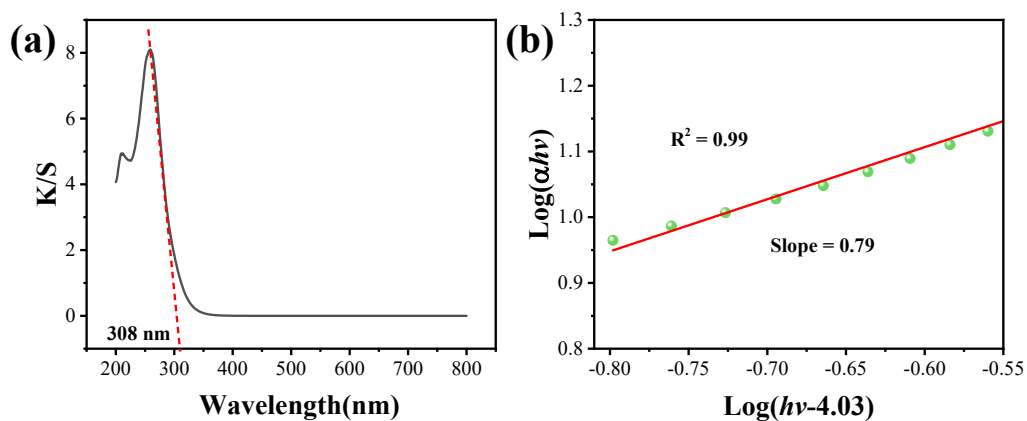

**Fig. S3** Determination of the band gap of CaNaSb<sub>2</sub>O<sub>6</sub>F.

The band gap of CaNaSb<sub>2</sub>O<sub>6</sub>F can be estimated according to equation (E1).

$$\alpha hv = A(hv - E_g)^{m/2} \quad (E1)$$

Where  $hv$  is the photon energy;  $E_g$  is the value of the band gap;  $m = 1$  for a direct band-gap;  $m = 4$  for an indirect band-gap. This equation can be derived as:

$$\text{Log}(\alpha hv) = (m/2) \text{log}(hv - E_g) + \text{log}(A) \quad (E2)$$

A spectrum shown in Figure S3a similar to the absorption spectrum is converted from the DRS spectrum. An approximate  $E_g$  is estimated as 4.03 eV. According to the derived formula, the slope of  $\text{Log}(\alpha hv)$  vs.  $\text{Log}(hv - E_g)$  is fitted with a linear equation to give the value of  $m$ . As shown in Figure S3b,  $m$  value is calculated to be 1. Thus, CaNaSb<sub>2</sub>O<sub>6</sub>F has a direct band gap.

**Table S1** Structure Refinement Parameters Obtained through Rietveld Refinement of Powder Diffraction Data of CNSOF.

| Formula                       | CNSOF              |
|-------------------------------|--------------------|
| Space group                   | <i>Fd-3m</i> (277) |
| $a = b = c$ (Å)               | 10.2850            |
| $\alpha = \beta = \gamma$ (°) | 90                 |
| Units, $Z$                    | 8                  |
| $V$ (Å <sup>3</sup> )         | 1087.97            |
| $R_p$ (%)                     | 5.47               |
| $R_{wp}$ (%)                  | 8.08               |
| $\chi^2$                      | 9.52               |

**Table S2** Atomic coordinates of the CNSOF.

| atom | site | x        | y        | z        | Occupancy |
|------|------|----------|----------|----------|-----------|
| Na1  | 16d  | 0.625000 | 0.625000 | 0.625000 | 0.5000    |
| Ca1  | 16d  | 0.625000 | 0.625000 | 0.625000 | 0.5000    |
| Sb1  | 16c  | 0.125000 | 0.125000 | 0.125000 | 1.0000    |
| O1   | 48f  | 0.200000 | 0.000000 | 0.000000 | 1.0000    |
| F1   | 8b   | 0.500000 | 0.500000 | 0.500000 | 1.0000    |

Table S3 The realistic possible error of the decay time of Bi<sup>3+</sup> ion content in the range of 0.2-3 mol%.

| $x$ (mol%) | $\tau$ (ns) | $\varepsilon$ (ns) |
|------------|-------------|--------------------|
| 0.002      | 536.562     | 2.55               |
| 0.004      | 527.245     | 2.29               |
| 0.006      | 508.842     | 2.07               |
| 0.008      | 469.995     | 1.74               |
| 0.01       | 438.663     | 1.43               |
| 0.02       | 372.639     | 0.92               |
| 0.03       | 334.227     | 0.61               |
